# Supplementary material
Source: PubMed Central journal article supplement (PMC3322471)
Supplement: cc1014_2390SD1.pdf [file cc1014_2390SD1.pdf]

## Supplemental Figure 1s

**A**

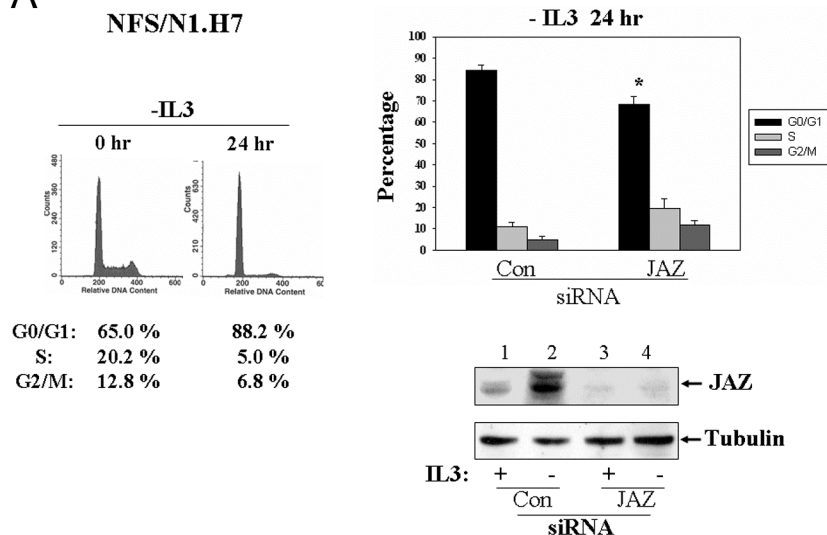

**B**

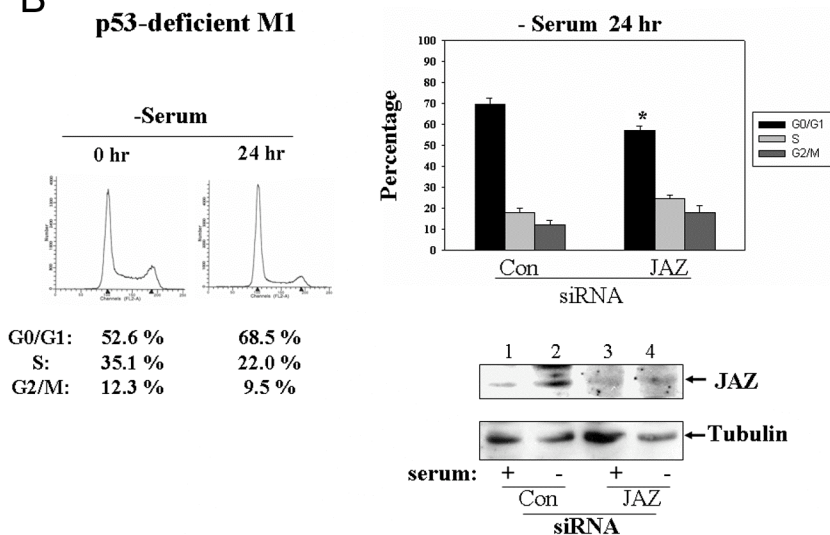

**Figure 1s. Endogenous JAZ plays a necessary role in IL-3 or serum deprivation-induced G1 cell cycle arrest.** IL-3-dependent NFS/N1.H7 murine myeloid cells (**A**) and IL-3-independent, p53-deficient M1 murine myeloid leukemic cells (**B**) were deprived of IL-3 or serum for 24 hr and harvested for flow cytometry analysis to determine cell cycle distribution (left panels). Flow cytometry analysis was also performed in H7 and M1 cells that were stably transfected with the JAZ-siRNA (or the control siRNA) expression plasmid (right panels). \*,  $P < 0.05$ .

0.001 vs. the control siRNA (Con). Western analysis was performed using antibodies against JAZ (JAZ111) and Tubulin as a load control (right panels). “+ or -” – IL-3 or serum was present or removed for 2 hr.
